# Supplementary material
Source: MDPI journal article supplement (https://www.mdpi.com/2077-0472/11/10/938)
Supplement: s1 [file s1]

Table S1: Multivariate probit estimates of individual management without CRE framework

|                                                   | Fertilizer | Variety    | Manure    | Pesticide | Herbicide | Erosion control | Intercropping | Crop rotation |
|---------------------------------------------------|------------|------------|-----------|-----------|-----------|-----------------|---------------|---------------|
| <i>Field characteristics</i>                      |            |            |           |           |           |                 |               |               |
| Ownership of land (1= owned)                      | -0.335*    | -0.083     | 0.553***  | 0.201     | -0.194*   | -0.193*         | 0.251*        | -0.058        |
|                                                   | (0.181)    | (0.153)    | (0.128)   | (0.170)   | (0.111)   | (0.110)         | (0.146)       | (0.086)       |
| Field size (log)                                  | 0.951***   | 1.624***   | -0.570*** | 0.317     | 1.500***  | 0.137           | -0.752***     | -0.463***     |
|                                                   | (0.236)    | (0.280)    | (0.183)   | (0.249)   | (0.180)   | (0.184)         | (0.262)       | (0.151)       |
| Distance from home (log)                          | 0.368***   | 0.314***   | -0.672*** | 0.080**   | -0.003    | -0.005          | -0.083*       | 0.192***      |
|                                                   | (0.042)    | (0.042)    | (0.035)   | (0.041)   | (0.029)   | (0.027)         | (0.047)       | (0.026)       |
| Number of years acquired (log)                    | -0.103     | 0.305***   | 0.064     | -0.171    | 0.076     | 0.120           | -0.397***     | -0.210***     |
|                                                   | (0.114)    | (0.102)    | (0.087)   | (0.110)   | (0.080)   | (0.078)         | (0.108)       | (0.057)       |
| <i>Household characteristics</i>                  |            |            |           |           |           |                 |               |               |
| Age of head (log)                                 | 0.020      | 0.006      | -0.248    | 0.047     | 0.018     | 0.214           | -0.467        | -0.024        |
|                                                   | (0.188)    | (0.208)    | (0.151)   | (0.248)   | (0.202)   | (0.169)         | (0.364)       | (0.108)       |
| Gender of head (1 =Male)                          | -0.108     | -0.163     | 0.098     | 0.301     | -0.334**  | -0.048          | 0.109         | -0.024        |
|                                                   | (0.176)    | (0.182)    | (0.134)   | (0.226)   | (0.167)   | (0.173)         | (0.212)       | (0.116)       |
| Education of head (log)                           | 0.037      | 0.195***   | -0.032    | -0.137**  | 0.094*    | 0.104**         | -0.217***     | -0.066**      |
|                                                   | (0.052)    | (0.058)    | (0.041)   | (0.064)   | (0.050)   | (0.046)         | (0.080)       | (0.031)       |
| Adults (log)                                      | -0.134     | -0.329*    | 0.222*    | -0.014    | -0.223    | -0.107          | 0.563**       | 0.163*        |
|                                                   | (0.158)    | (0.188)    | (0.117)   | (0.201)   | (0.148)   | (0.141)         | (0.274)       | (0.094)       |
| Asset value (log)                                 | 0.045      | 0.159**    | 0.139***  | 0.020     | -0.009    | -0.077          | -0.062        | 0.030         |
|                                                   | (0.059)    | (0.070)    | (0.043)   | (0.071)   | (0.055)   | (0.052)         | (0.079)       | (0.037)       |
| Livestock (log)                                   | -0.108     | 0.280***   | 0.129*    | -0.059    | 0.221**   | 0.013           | -0.063        | -0.147***     |
|                                                   | (0.094)    | (0.096)    | (0.071)   | (0.135)   | (0.088)   | (0.085)         | (0.107)       | (0.052)       |
| Number of plots (log)                             | 0.074      | -0.688***  | -0.492*** | 0.182     | 0.103     | 0.171           | 0.222         | 0.183**       |
|                                                   | (0.152)    | (0.197)    | (0.111)   | (0.190)   | (0.132)   | (0.138)         | (0.210)       | (0.092)       |
| <i>Community characteristics</i>                  |            |            |           |           |           |                 |               |               |
| Extension visits(log)                             | 0.046      | 0.025      | 0.053     | 0.100     | 0.087     | 0.403***        | 0.219*        | 0.022         |
|                                                   | (0.065)    | (0.072)    | (0.049)   | (0.097)   | (0.059)   | (0.061)         | (0.113)       | (0.040)       |
| Distance to market (log)                          | -0.071     | -0.034     | 0.015     | 0.031     | -0.237*** | 0.007           | -0.026        | 0.107***      |
|                                                   | (0.050)    | (0.062)    | (0.039)   | (0.065)   | (0.049)   | (0.049)         | (0.077)       | (0.032)       |
| Rainfall variability in the previous season (log) | 0.351      | -0.207     | 0.572***  | 0.152     | 0.244     | -0.232          | 1.809***      | 0.221         |
|                                                   | (0.235)    | (0.273)    | (0.156)   | (0.256)   | (0.199)   | (0.211)         | (0.310)       | (0.142)       |
| Total rainfall in the previous season (log)       | 1.085***   | 1.676***   | 0.073     | -0.576**  | 0.961***  | 0.344           | -0.808***     | 0.378***      |
|                                                   | (0.223)    | (0.297)    | (0.184)   | (0.290)   | (0.222)   | (0.220)         | (0.291)       | (0.142)       |
| Year (1=2018)                                     | 0.366***   | 0.243***   | -0.067    | 0.721***  | 0.068     | -0.278***       | 0.455***      | -0.078*       |
|                                                   | (0.064)    | (0.082)    | (0.050)   | (0.117)   | (0.057)   | (0.079)         | (0.111)       | (0.042)       |
| Zone                                              | 0.233***   | 0.207***   | -0.061    | -0.090    | 0.182***  | -0.131***       | -0.217***     | 0.020         |
|                                                   | (0.046)    | (0.064)    | (0.040)   | (0.072)   | (0.046)   | (0.041)         | (0.058)       | (0.025)       |
| Constant                                          | -6.533***  | -11.325*** | 0.947     | 1.523     | -7.325*** | -4.378***       | 7.185***      | -3.044***     |
|                                                   | (1.505)    | (1.986)    | (1.260)   | (1.753)   | (1.654)   | (1.539)         | (1.948)       | (0.998)       |
| 3914                                              |            |            |           |           |           |                 |               |               |

Standard errors in parentheses. \*  $p < 0.10$ , \*\*  $p < 0.05$ , \*\*\*  $p < 0.01$

Table S2: Multivariate probit estimates of individual management with CRE framework

|                                   |                      |                      |                      |                     |                      |                      |                      |                      |
|-----------------------------------|----------------------|----------------------|----------------------|---------------------|----------------------|----------------------|----------------------|----------------------|
| <b>Field characteristics</b>      |                      |                      |                      |                     |                      |                      |                      |                      |
| Ownership of land (1= owned)      | -0.284<br>(0.197)    | 0.180<br>(0.157)     | 0.557***<br>(0.145)  | 0.221<br>(0.136)    | -0.107<br>(0.092)    | -0.104<br>(0.104)    | 0.232<br>(0.151)     | -0.088<br>(0.105)    |
| Area size (log)                   | 1.547***<br>(0.234)  | 1.728***<br>(0.279)  | -0.606***<br>(0.208) | 0.311<br>(0.199)    | 1.341***<br>(0.163)  | 0.534***<br>(0.183)  | 0.060<br>(0.290)     | -0.300*<br>(0.178)   |
| Distance from home (minute)       | 0.374***<br>(0.042)  | 0.317***<br>(0.042)  | -0.672***<br>(0.035) | 0.083**<br>(0.040)  | 0.001<br>(0.029)     | -0.005<br>(0.027)    | -0.083*<br>(0.047)   | 0.188***<br>(0.025)  |
| Number of years acquired (log)    | 0.018<br>(0.116)     | -0.003<br>(0.103)    | 0.194*<br>(0.108)    | -0.149<br>(0.092)   | 0.010<br>(0.071)     | 0.167**<br>(0.085)   | -0.241**<br>(0.111)  | -0.157**<br>(0.071)  |
| <b>Household characteristics</b>  |                      |                      |                      |                     |                      |                      |                      |                      |
| Age (log)                         | 0.130<br>(0.207)     | -0.325<br>(0.224)    | -0.106<br>(0.161)    | 0.068<br>(0.249)    | -0.044<br>(0.214)    | 0.257<br>(0.180)     | -0.404<br>(0.430)    | 0.018<br>(0.114)     |
| Gender (1 =Male)                  | -0.155<br>(0.177)    | -0.090<br>(0.177)    | 0.064<br>(0.134)     | 0.292<br>(0.225)    | -0.299*<br>(0.167)   | -0.072<br>(0.173)    | 0.033<br>(0.208)     | -0.029<br>(0.114)    |
| Education (log)                   | 0.057<br>(0.053)     | 0.185***<br>(0.060)  | -0.017<br>(0.041)    | -0.135**<br>(0.062) | 0.083<br>(0.051)     | 0.111**<br>(0.046)   | -0.182**<br>(0.079)  | -0.063**<br>(0.031)  |
| Adults (log)                      | -0.061<br>(0.162)    | -0.346*<br>(0.189)   | 0.221*<br>(0.117)    | -0.009<br>(0.204)   | -0.222<br>(0.148)    | -0.060<br>(0.144)    | 0.706***<br>(0.268)  | 0.178*<br>(0.094)    |
| Asset value (log)                 | 0.058<br>(0.060)     | 0.181**<br>(0.071)   | 0.122***<br>(0.045)  | 0.018<br>(0.074)    | -0.014<br>(0.056)    | -0.061<br>(0.054)    | -0.017<br>(0.086)    | 0.048<br>(0.038)     |
| Livestock (log)                   | -0.043<br>(0.124)    | 0.155<br>(0.159)     | 0.259**<br>(0.114)   | 0.013<br>(0.224)    | 0.091<br>(0.138)     | 0.146<br>(0.145)     | 0.190<br>(0.194)     | -0.046<br>(0.085)    |
| Number of plots (log)             | 0.005<br>(0.160)     | -0.724***<br>(0.195) | -0.463***<br>(0.112) | 0.194<br>(0.194)    | 0.107<br>(0.135)     | 0.166<br>(0.142)     | 0.131<br>(0.200)     | 0.183**<br>(0.092)   |
| <b>Community characteristics</b>  |                      |                      |                      |                     |                      |                      |                      |                      |
| Extension visit (log)             | 0.058<br>(0.067)     | 0.022<br>(0.072)     | 0.053<br>(0.050)     | 0.096<br>(0.096)    | 0.083<br>(0.059)     | 0.402***<br>(0.061)  | 0.267**<br>(0.109)   | 0.018<br>(0.040)     |
| Distance to market (log)          | -0.079<br>(0.052)    | -0.023<br>(0.061)    | 0.009<br>(0.040)     | 0.034<br>(0.065)    | -0.231***<br>(0.049) | 0.003<br>(0.049)     | -0.032<br>(0.078)    | 0.106***<br>(0.032)  |
| Lagged total rainfall (log)       | 1.069***<br>(0.224)  | 1.650***<br>(0.289)  | 0.073<br>(0.185)     | -0.591**<br>(0.286) | 0.966***<br>(0.224)  | 0.295<br>(0.220)     | -0.767**<br>(0.308)  | 0.368***<br>(0.142)  |
| Lagged rainfall variability (log) | 0.295<br>(0.237)     | -0.230<br>(0.274)    | 0.554***<br>(0.159)  | 0.129<br>(0.256)    | 0.216<br>(0.201)     | -0.272<br>(0.208)    | 1.679***<br>(0.292)  | 0.221<br>(0.140)     |
| Year (1=2018)                     | 0.360***<br>(0.065)  | 0.236***<br>(0.081)  | -0.064<br>(0.050)    | 0.712***<br>(0.118) | 0.063<br>(0.057)     | -0.296***<br>(0.080) | 0.441***<br>(0.111)  | -0.093**<br>(0.041)  |
| Zone                              | 0.192*** (0.049)     | 0.209***<br>(0.068)  | -0.062 (0.043)       | -0.090<br>(0.074)   | 0.191***<br>(0.049)  | -0.160***<br>(0.044) | -0.284***<br>(0.072) | 0.007<br>(0.027)     |
| <b>CRE variables</b>              |                      |                      |                      |                     |                      |                      |                      |                      |
| Mean field size                   | -1.045***<br>(0.331) | -0.205<br>(0.372)    | 0.130<br>(0.281)     | 0.063<br>(0.362)    | 0.266<br>(0.300)     | -0.677**<br>(0.325)  | -1.544***<br>(0.504) | -0.303<br>(0.236)    |
| Mean number of years acquired     | -0.018<br>(0.024)    | 0.074***<br>(0.021)  | -0.027<br>(0.017)    | -0.005<br>(0.023)   | 0.016<br>(0.017)     | -0.005<br>(0.017)    | -0.027<br>(0.029)    | -0.008<br>(0.011)    |
| Mean ownership                    | -0.252<br>(0.381)    | -0.445<br>(0.315)    | -0.053 (0.236)       | -0.081<br>(0.329)   | -0.213<br>(0.238)    | -0.288<br>(0.259)    | -0.114<br>(0.406)    | 0.017<br>(0.178)     |
| Mean livestock                    | -0.008<br>(0.027)    | 0.029<br>(0.036)     | -0.026<br>(0.025)    | -0.017<br>(0.061)   | 0.024<br>(0.027)     | -0.027<br>(0.026)    | -0.052<br>(0.042)    | -0.023<br>(0.018)    |
| Constant                          | -6.449***<br>(1.538) | -9.897***<br>(1.940) | 0.362<br>(1.289)     | 1.487<br>(1.789)    | -7.110***<br>(1.672) | -4.011**<br>(1.571)  | 7.051***<br>(2.149)  | -3.133***<br>(1.040) |
| No of observations                | 3914                 | 3914                 | 3914                 | 3914                | 3914                 | 3914                 | 3914                 | 3914                 |

Standard errors in parentheses. \*  $p < 0.10$ , \*\*  $p < 0.05$ , \*\*\*  $p < 0.01$

Table S3: Multinomial logit estimates of management package decisions without CRE framework. The control group is use of fertilizer and improved maize variety.

|                                                   | 2                    | 3                    | 4                    | 5                     | 6                     | 7                     | 8                     |
|---------------------------------------------------|----------------------|----------------------|----------------------|-----------------------|-----------------------|-----------------------|-----------------------|
| <b>Field characteristics</b>                      |                      |                      |                      |                       |                       |                       |                       |
| Ownership of land (1= owned)                      | 1.955***<br>(0.529)  | -0.175<br>(0.204)    | 0.390<br>(0.427)     | -0.223<br>(0.261)     | 0.565<br>(0.511)      | -0.232<br>(0.242)     | 0.521<br>(0.502)      |
| Field size (log)                                  | -1.225*<br>(0.637)   | -1.105***<br>(0.405) | -1.831**<br>(0.770)  | 1.284***<br>(0.481)   | 0.170<br>(0.773)      | 1.054**<br>(0.439)    | 0.887<br>(0.820)      |
| Distance from home (log)                          | -1.430***<br>(0.109) | 0.140**<br>(0.063)   | -0.981***<br>(0.107) | 0.164*<br>(0.084)     | -1.096***<br>(0.137)  | 0.181**<br>(0.080)    | -0.867***<br>(0.126)  |
| Number of years acquired (log)                    | 0.060                | -0.239               | 0.230                | 0.000                 | -0.355                | -0.203                | 0.175                 |
| <b>Household characteristics</b>                  |                      |                      |                      |                       |                       |                       |                       |
| Age (log)                                         | -0.358<br>(0.423)    | 0.165<br>(0.279)     | -0.471<br>(0.400)    | 0.215<br>(0.377)      | -0.802<br>(0.691)     | 0.071<br>(0.411)      | -0.217<br>(0.617)     |
| Gender (1 =Male)                                  | -0.080<br>(0.426)    | -0.101<br>(0.284)    | -0.333<br>(0.542)    | 0.034<br>(0.443)      | -0.183<br>(0.621)     | 0.081<br>(0.417)      | -0.266<br>(0.559)     |
| Education (log)                                   | -0.012<br>(0.113)    | -0.030<br>(0.082)    | 0.067<br>(0.137)     | -0.243**<br>(0.121)   | -0.203<br>(0.164)     | -0.228**<br>(0.111)   | -0.005<br>(0.178)     |
| Number of adults (log)                            | 0.992***<br>(0.354)  | 0.537**<br>(0.243)   | 0.430<br>(0.399)     | -0.116<br>(0.336)     | -0.296<br>(0.633)     | 0.113<br>(0.310)      | 0.086<br>(0.500)      |
| Asset value (log)                                 | 0.053<br>(0.136)     | -0.077<br>(0.094)    | 0.156<br>(0.144)     | 0.174<br>(0.127)      | 0.268<br>(0.171)      | 0.046<br>(0.125)      | 0.519***<br>(0.186)   |
| Livestock (log)                                   | 0.414*<br>(0.236)    | -0.003<br>(0.140)    | 0.147<br>(0.263)     | -0.034<br>(0.208)     | 0.216<br>(0.302)      | -0.147<br>(0.211)     | -0.089<br>(0.274)     |
| Number of plots (log)                             | -1.031***<br>(0.341) | 0.281<br>(0.250)     | 0.198<br>(0.410)     | 0.324<br>(0.344)      | 0.366<br>(0.486)      | 0.514<br>(0.334)      | 0.336<br>(0.484)      |
| <b>Community characteristics</b>                  |                      |                      |                      |                       |                       |                       |                       |
| Rainfall variability in the previous season (log) | 0.014<br>(0.756)     | -0.856<br>(0.552)    | 0.452<br>(0.972)     | -3.269***<br>(1.022)  | -1.822*<br>(1.101)    | -3.123***<br>(0.922)  | -1.121<br>(1.122)     |
| Total rainfall in the previous season (log)       | 0.614<br>(1.130)     | 0.136<br>(0.632)     | 0.018<br>(1.218)     | 5.308***<br>(1.071)   | 4.677***<br>(1.467)   | 5.996***<br>(0.956)   | 4.571***<br>(1.344)   |
| Number of extension visits (log)                  | 0.349**<br>(0.154)   | 0.329***<br>(0.118)  | 0.468***<br>(0.171)  | 0.318**<br>(0.148)    | 0.351<br>(0.214)      | 0.611***<br>(0.142)   | 0.589***<br>(0.220)   |
| Distance to market (log)                          | -0.160<br>(0.127)    | 0.157*<br>(0.094)    | 0.035<br>(0.148)     | -0.172<br>(0.109)     | -0.188<br>(0.164)     | -0.119<br>(0.112)     | -0.177<br>(0.178)     |
| Year (1=2018)                                     | -0.004<br>(0.180)    | -0.201<br>(0.129)    | -0.521**<br>(0.205)  | 0.036<br>(0.185)      | -0.053<br>(0.257)     | -0.311*<br>(0.162)    | 0.234<br>(0.281)      |
| East Wollega                                      | -1.237<br>(1.071)    | 0.236<br>(0.518)     | -0.256<br>(1.128)    | -2.234**<br>(0.870)   | -3.517***<br>(1.314)  | -3.229***<br>(0.850)  | -3.638***<br>(1.205)  |
| Jimma                                             | -1.404<br>(1.082)    | 0.049<br>(0.507)     | -0.380<br>(1.182)    | -4.383***<br>(0.977)  | -4.844***<br>(1.477)  | -5.867***<br>(0.966)  | -4.777***<br>(1.321)  |
| West Gojjam                                       | -0.362<br>(1.144)    | 0.480<br>(0.561)     | 0.826<br>(1.191)     | -4.217***<br>(0.968)  | -3.900***<br>(1.493)  | -5.057***<br>(0.931)  | -3.697***<br>(1.346)  |
| West Shoa                                         | -0.961<br>(1.018)    | 0.559<br>(0.514)     | -0.057<br>(1.121)    | -1.124<br>(0.865)     | -2.411*<br>(1.286)    | -2.675***<br>(0.825)  | -2.777**<br>(1.151)   |
| Constant                                          | -2.516<br>(7.449)    | -3.265<br>(4.149)    | 0.031<br>(7.996)     | -38.623***<br>(6.961) | -27.898***<br>(9.816) | -41.538***<br>(6.375) | -31.619***<br>(8.719) |
| Number of Obs.                                    | 3341                 |                      |                      |                       |                       |                       |                       |

Standard errors in parentheses. \*  $p < 0.10$ , \*\*  $p < 0.05$ , \*\*\*  $p < 0.01$

Table S4: Multinomial logit estimates of management package decisions with MC device and study zones. The control group is use of fertilizer and improved maize variety.

|                                                         | 2                    | 3                   | 4                    | 5                    | 6                    | 7                    | 8                    |
|---------------------------------------------------------|----------------------|---------------------|----------------------|----------------------|----------------------|----------------------|----------------------|
| Variables                                               | Mgt2                 | Mgt3                | Mgt4                 | Mgt5                 | Mgt6                 | Mgt7                 | Mgt8                 |
| <i>Field characteristics</i>                            |                      |                     |                      |                      |                      |                      |                      |
| Ownership of land<br>(1= owned)                         | 1.861<br>(0.571)***  | -0.494<br>(0.262)** | -0.036<br>(0.547)    | -0.48<br>(0.293)     | 0.708<br>(0.543)     | -0.307<br>(0.26)     | 1<br>(0.548)*        |
| Field size (log)                                        | -1.059<br>(0.697)    | -0.494<br>(0.441)   | -1.446<br>(0.833)*   | 1.509<br>(0.466)***  | 1.482<br>(0.793)*    | 1.656<br>(0.443)***  | 1.867<br>(0.943)**   |
| Distance from home<br>(log)                             | -1.42<br>(0.109)***  | 0.135<br>(0.064)**  | -0.982<br>(0.107)*** | 0.168<br>(0.083)**   | -1.104<br>(0.136)*** | 0.188<br>(0.081)**   | -0.852<br>(0.127)*** |
| Number of years<br>acquired (log)                       | 0.462<br>(0.36)      | -0.046<br>(0.197)   | 0.825<br>(0.429)**   | 0.168<br>(0.215)     | -0.098<br>(0.308)    | 0.007<br>(0.208)     | 0.394<br>(0.519)     |
| <i>Household characteristics</i>                        |                      |                     |                      |                      |                      |                      |                      |
| Age (log)                                               | -0.057<br>(0.432)    | 0.26<br>(0.3)       | -0.136<br>(0.441)    | 0.325<br>(0.405)     | -0.511<br>(0.776)    | 0.296<br>(0.437)     | 0.183<br>(0.692)     |
| Gender (1 =Male)                                        | -0.174<br>(0.432)    | -0.132<br>(0.286)   | -0.45<br>(0.546)     | 0.011<br>(0.451)     | -0.237<br>(0.633)    | 0.055<br>(0.422)     | -0.366<br>(0.566)    |
| Education (log)                                         | -0.008<br>(0.111)    | -0.035<br>(0.082)   | 0.054<br>(0.135)     | -0.236<br>(0.12)**   | -0.197<br>(0.163)    | -0.216<br>(0.11)**   | -0.007<br>(0.178)    |
| Number of adults<br>(log)                               | 1.034<br>(0.353)***  | 0.563<br>(0.244)**  | 0.491<br>(0.396)     | -0.117<br>(0.337)    | -0.203<br>(0.641)    | 0.166<br>(0.313)     | 0.19<br>(0.495)      |
| Asset value (log)                                       | 0.067<br>(0.139)     | -0.038<br>(0.095)   | 0.167<br>(0.154)     | 0.208<br>(0.132)     | 0.332<br>(0.181)*    | 0.097<br>(0.127)     | 0.554<br>(0.193)***  |
| Livestock (log)                                         | 0.591<br>(0.344)*    | 0.003<br>(0.227)    | 0.218<br>(0.411)     | 0.23<br>(0.314)      | 0.871<br>(0.537)     | 0.411<br>(0.331)     | 0.147<br>(0.49)      |
| Number of plots (log)                                   | -1.035<br>(0.338)*** | 0.235<br>(0.253)    | 0.189<br>(0.412)     | 0.329<br>(0.348)     | 0.403<br>(0.49)      | 0.554<br>(0.337)     | 0.327<br>(0.492)     |
| <i>Community characteristics</i>                        |                      |                     |                      |                      |                      |                      |                      |
| Total rainfall in the<br>previous season (log)          | 0.606<br>(1.133)     | 0.172<br>(0.631)    | -0.013<br>(1.237)    | 5.326<br>(1.075)***  | 4.86<br>(1.521)***   | 6.063<br>(0.961)***  | 4.783<br>(1.378)***  |
| Rainfall variability in<br>the previous season<br>(log) | -0.038<br>(0.773)    | -0.89<br>(0.548)    | 0.428<br>(0.991)     | -3.312<br>(1.027)*** | -2.091<br>(1.104)*   | -3.204<br>(0.91)***  | -1.434<br>(1.077)    |
| Number of extension<br>visit (log)                      | 0.348<br>(0.155)**   | 0.336<br>(0.118)*** | 0.475<br>(0.171)***  | 0.321<br>(0.148)**   | 0.363<br>(0.212)*    | 0.619<br>(0.144)***  | 0.597<br>(0.222)***  |
| Distance to market<br>(log)                             | -0.18<br>(0.126)     | 0.14<br>(0.093)     | 0.018<br>(0.147)     | -0.186<br>(0.11)*    | -0.193<br>(0.163)    | -0.128<br>(0.111)    | -0.179<br>(0.179)    |
| Year (1=2018)                                           | -0.038<br>(0.182)    | -0.213<br>(0.13)    | -0.547<br>(0.204)*** | 0.026<br>(0.187)     | -0.105<br>(0.264)    | -0.344<br>(0.163)**  | 0.171<br>(0.282)     |
| <i>Study zone</i>                                       |                      |                     |                      |                      |                      |                      |                      |
|                                                         | -1.26<br>(1.081)     | 0.16<br>(0.529)     | -0.254<br>(1.164)    | -2.234<br>(0.883)**  | -3.873<br>(1.369)*** | -3.35<br>(0.864)***  | -4<br>(1.244)***     |
| East Wollega                                            | -1.481<br>(1.124)    | -0.131<br>(0.523)   | -0.454<br>(1.235)    | -4.47<br>(0.987)***  | -5.511<br>(1.569)*** | -6.17<br>(0.977)***  | -5.367<br>(1.422)*** |
| Jimma                                                   | -0.47<br>(1.176)     | 0.292<br>(0.579)    | 0.726<br>(1.229)     | -4.311<br>(1.001)*** | -4.624<br>(1.583)*** | -5.402<br>(0.957)*** | -4.334<br>(1.42)***  |
| West Gojjam                                             | -1.048<br>(1.047)    | 0.379<br>(0.536)    | -0.124<br>(1.164)    | -1.167<br>(0.894)    | -3.033<br>(1.361)**  | -2.939<br>(0.848)*** | -3.386<br>(1.231)*** |
| West Shoa                                               | -0.364<br>(0.826)    | -1.251<br>(0.55)**  | -0.773<br>(0.942)    | -0.385<br>(0.729)    | -2.424<br>(1.119)**  | -1.015<br>(0.752)    | -1.754<br>(1.253)    |
| Mean area                                               | -0.075<br>(0.044)    | -0.042<br>(0.031)   | -0.115<br>(0.058)**  | -0.034<br>(0.04)     | -0.046<br>(0.062)    | -0.045<br>(0.038)    | -0.034<br>(0.063)    |
| Mean number of<br>years acquired                        | 0.072<br>(0.625)     | 0.842<br>(0.44)*    | 0.919<br>(0.804)     | 0.623<br>(0.596)     | -0.494<br>(0.848)    | 0.098<br>(0.535)     | -1.377<br>(0.767)*   |
| Mean ownership                                          |                      |                     |                      |                      |                      |                      |                      |

|                |                   |                  |                   |                       |                        |                       |                       |
|----------------|-------------------|------------------|-------------------|-----------------------|------------------------|-----------------------|-----------------------|
| Mean TLU       | -0.037<br>(0.067) | 0.005<br>(0.045) | -0.006<br>(0.091) | -0.06<br>(0.062)      | -0.138<br>(0.097)      | -0.124<br>(0.061)**   | -0.052<br>(0.091)     |
| Constant       | -3.495<br>(7.507) | -3.777<br>(4.14) | -1.15<br>(7.969)  | -39.465<br>(6.989)*** | -29.853<br>(10.254)*** | -42.945<br>(6.406)*** | -33.618<br>(8.873)*** |
| Number of Obs. | 3341              | 3341             | 3341              | 3341                  | 3341                   | 3341                  | 3341                  |

Standard errors in parentheses. \*  $p < 0.10$ , \*\*  $p < 0.05$ , \*\*\*  $p < 0.01$

**Note:**

2= Mgt2= Fertilizer + improved variety + manure

3= Mgt3= Fertilizer + improved variety + Integrated management

4= Mgt4= Fertilizer + improved variety + Integrated management + manure

5= Mgt5= Fertilizer + improved variety + crop protection

6= Mgt6= Fertilizer + improved variety + crop protection + manure

7= Mgt7= Fertilizer + improved variety + crop protection + Integrated management

8= Mgt8= Fertilizer + improved variety + crop protection + manure + Integrated management

Analysis of variance (ANOVA) was also used to compare mean values of outcome variables – maize yield, labor productivity– across the management packages. We applied the Bonferroni correction (Field, 2013) to correct for potential spurious inference that could come from making multiple comparisons between group means of outcome variables.

Table S5: maize yield comparisons across the management packages

|   | 1     | 2       | 3     | 4     | 5     | 6     | 7     |
|---|-------|---------|-------|-------|-------|-------|-------|
| 2 | -0.31 |         |       |       |       |       |       |
| 3 | 0.08  | 0.39*   |       |       |       |       |       |
| 4 | -0.06 | 0.25    | -0.14 |       |       |       |       |
| 5 | 0.28  | 0.59*** | 0.20  | 0.34  |       |       |       |
| 6 | 0.09  | 0.40    | 0.01  | 0.15  | -0.19 |       |       |
| 7 | 0.29  | 0.59**  | 0.21  | 0.35  | 0.01  | 0.20  |       |
| 8 | -0.12 | 0.19    | -0.20 | -0.06 | -0.40 | -0.21 | -0.40 |
